# Supplementary material
Source: Springer Nature journal article supplement (https://www.springermedizin.de/resource/supplementary/12876_2009_448_MOESM4_ESM.pdf/9437030)

# Relative luciferase activity

Expression vector

hCAR(-)

hCAR(+)

T-w-(TA)6\_wild

G-m-(TA)7\_Gilbert

T-w-(TA)7\_combination

G-m-(TA)6\_combination

G-w-(TA)6\_combination

T-m-(TA)7\_combination

G-w-(TA)7\_combination

T-m-(TA)6\_combination

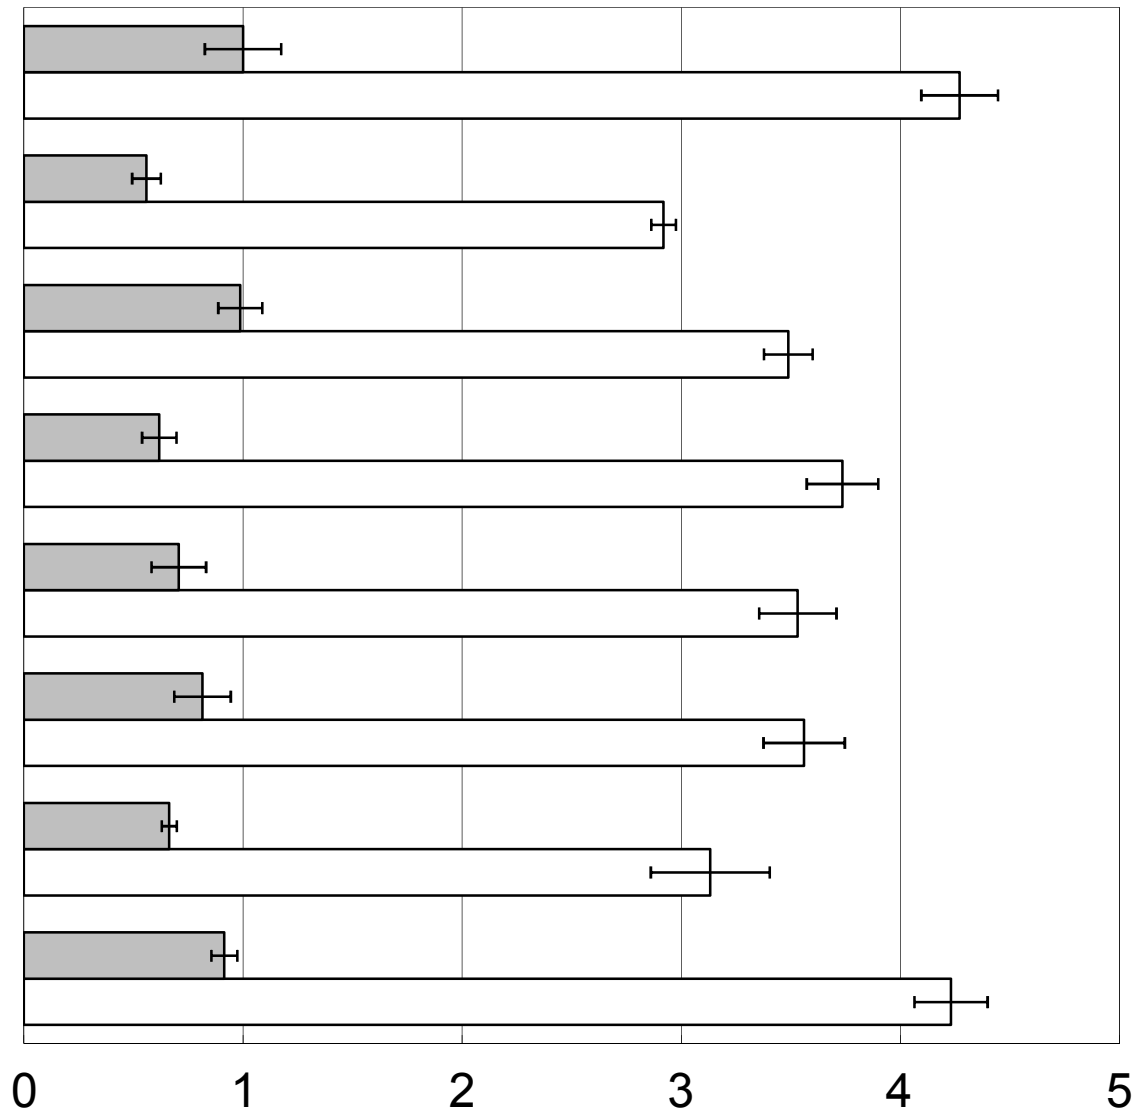

Supplement: MOESM4 [file 9437030]
